# Supplementary material for: Targeting of Cdc42 GTPase in regulatory T cells unleashes antitumor T-cell immunity
Source: HighWire-hosted journal article supplement (doi:10.1136/jitc-2022-004806), 2022-11-01
Supplement: jitc-2022-004806supp002_data_supplement.pdf [file jitc-2022-004806supp002_data_supplement.pdf]

### Targeting of Cdc42 GTPase in regulatory T cells unleashes anti-tumor T cell immunity

Khalid W Kalim, Jun-Qi Yang, Mark Wunderlich, Vishnu Modur, Phuong Nguyen, Yuan Li, Ting Wen, Ashley Kuenzi Davis, Ravinder Verma, Q Richard Lu, Anil G Jegga, Yi Zheng, Fukun Guo

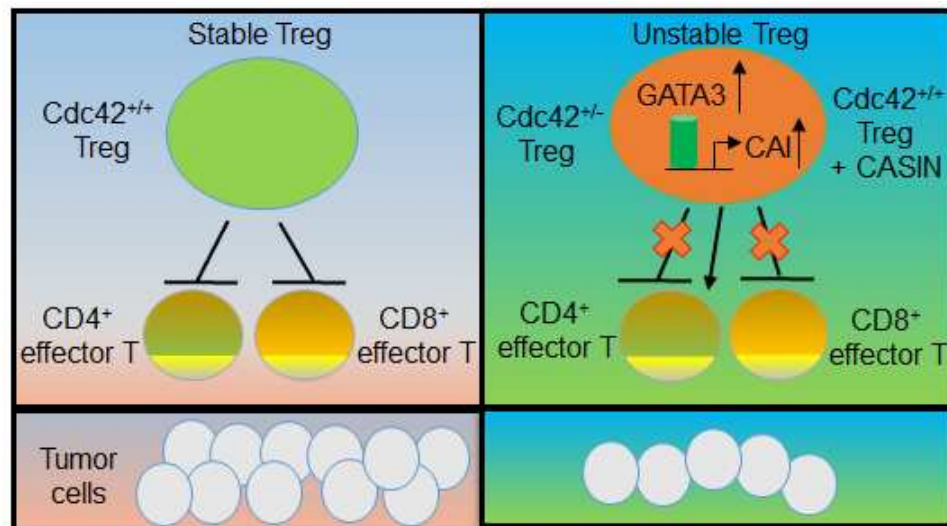

- Cdc42 heterozygosity and Cdc42 inhibitor CASIN promote Treg cell instability
- Cdc42 targeting-induced Treg cell instability causes Treg cell conversion to and derepression of effector T cells, leading to anti-tumor T cell immunity
- GATA3-mediated CAI expression drives Cdc42 targeting-induced Treg cell instability and anti-tumor T cell immunity
